# Supplementary material for: Mechanism of delayed seed germination caused by high temperature during grain filling in rice (Oryza sativa L.)
Source: PubMed Central journal article supplement (PMC7562956; doi:10.1038/s41598-020-74281-9), 2020-10-15
Supplement: 41598_2020_74281_MOESM1_ESM.pdf [file 41598_2020_74281_MOESM1_ESM.pdf]

# **Mechanism of Delayed Seed Germination Caused by High Temperature During Grain Filling in Rice (*Oryza sativa* L.)**

Chetphilin Suriyasak<sup>1</sup>, Yui Oyama<sup>1</sup>, Toshiaki Ishida<sup>2</sup>, Kiyoshi Mashiguchi<sup>2</sup>, Shinjiro Yamaguchi<sup>2</sup>, Norimitsu Hamaoka<sup>1</sup>, Mari Iwaya-Inoue<sup>1</sup>, Yushi Ishibashi<sup>1\*</sup>

<sup>1</sup>Faculty of Agriculture, Kyushu University, Fukuoka, Japan

<sup>2</sup>Kyoto University, Kyoto, Japan

**Supplemental Table 1**

**Supplemental Figure 1**

**Supplemental Figure 2**

**Supplemental Figure 3**

**Supplemental Figure 4**

**Supplemental Table 1** Primer sequences used for qRT-PCR and Chop-qPCR

| qRT-PCR primers   | Forward (5'-3')             | Reverse (5'-3')             |
|-------------------|-----------------------------|-----------------------------|
| <i>OsActin</i>    | GACTCTGGTGATGGTGTGTCAGC     | GGCTGGAAGAGGACCTCAGG        |
| <i>OsGA3ox1</i>   | GGAGAGCAAGGCCGTGTATCAGG     | CTCTCCTTGTCTCTTCCTTCGCTAC   |
| <i>OsGA20ox1</i>  | CCACTACTTCCGGCGATTCTTCCAGCG | GACGTGGTCTCTGGTGGAGGATGGTG  |
| <i>OsGA20ox2</i>  | CGCCGACTACTTCTCCAGCACC      | GCTGTCCGCGAAGAACTCCCT       |
| <i>OsNCED1</i>    | CTGGAGCACATGGAGCTAGTGCACTCC | CCGACGCCGAAGTAGCCGTACCTG    |
| <i>OsNCED2</i>    | TCATTCCAAAACACCTTCCA        | TCCGGGGACCTCCTATGTAT        |
| <i>OsNCED3</i>    | CCCCTCCCAAACCATCCAAACCGA    | TGTGAGCATATCCTGGCGTCGTGA    |
| <i>OsNCED4</i>    | TCCATCTCCTTCTCCCTCCTCCC     | CCTCGCACCTGCTTGATCTTGCC     |
| <i>OsNCED5</i>    | CACATCCGAGCTCCTCGTCGTGAAC   | GAATCAAGAATCCATGGATGGCCGGTG |
| <i>OsABA8'OH1</i> | AAGTACAGGTGGTCCACGTCCAA     | CCAGCTTAGCTGATGCTAGTATTC    |
| <i>OsABA8'OH2</i> | GACGAGGTGGAGTACAGCCCCTTC    | GGACACATCAGCCACCATCAGCAGTAG |
| <i>OsABA8'OH3</i> | AGTACAGCCCATTCCCTGTG        | ACGCCTAATCAAACCATTGC        |
| <i>OsGAMYB</i>    | CAGTGGCAATTCATTCACTGAATC    | TCCAGATCCATTGAAGTGCTTTG     |
| <i>OsAmy1A</i>    | GATACGACGTGCAACACCTC        | CGGATCGGATACAGCTCGTTG       |
| <i>OsAmy1C</i>    | TATCATGGAGGCTGACAGCG        | GCTAATTGTGCCTCTCCACC        |
| <i>OsAmy3B</i>    | GATTGGGACACGGTATGACG        | CTGCAGGAACCTCTGAGACCG       |
| <i>OsAmy3E</i>    | GAGAAGGAAGGCCTCAGGGTTCCTG   | GAAGCTCGCTCGTACACATCTCGCAG  |
| <i>OsDOG1L1</i>   | GAGTCGTTGGCGACGGTGAAG       | ATGAGGAAGTGACCGGCCTG        |
| <i>OsDOG1L2</i>   | TCTTAGTGAGTGGTGTGCTGGGA     | GTGAATCATCAGCTTTCACAGC      |
| <i>OsDOG1L3</i>   | CAGTAGCAATAGTACCTCATAAT     | AGCGAATCATGATTGTGACCTG      |
| <i>OsDOG1L5-1</i> | GACAATCCGACAAGCTGCC         | GTTGTTACTCCCGTGGCCTA        |
| <i>OsDOG1L5-3</i> | TCCTGAGAGAGCGTAACTGCG       | TACAGGCCCAAGAGCCCAATCTA     |

| Chop-qPCR primers         | Forward (5'-3')          | Reverse (5'-3')          |
|---------------------------|--------------------------|--------------------------|
| <i>OsABA8'OH1</i> : proP1 | GAGCTGCATGCGCACGACCATTTC | CGGTATCACTGACCGCGGCTAGC  |
| <i>OsABA8'OH1</i> : proP2 | AGTACGTAGTACGTACGAGAGCGC | TACAGTGATAGCTAAATGGGCCTC |
| <i>OsABA8'OH1</i> : proP3 | ATTGATTGCGCAATTATTCGGCAG | TACTAGTAGCTAGCACCACCACTA |
| <i>OsABA8'OH1</i> : proP4 | GTGCTCGCGCCTTCTTGCTTGT   | GGTCTTGACGAGTACAGCTGGA   |
| <i>OsABA8'OH3</i> : proP1 | CCTAGCTCGCGACACCATATGAG  | GATCTTTCGAATGGTGGTGGCGT  |
| <i>OsNCED5</i> : proP1    | TGTCTCCTTCTCCCCAAACTC    | AGGAGAGGTGAGAGCTGGAGTTGG |
| <i>OsAmy1C</i> : proP1    | GTACATGAACAGAGGTGCAATGC  | AACAGATTTTGCTAGTCGGTAGTC |
| <i>OsAmy3B</i> : proP1    | CGCTGGATGCGGTGCTCGTTGAAG | GCACCGCCGAACCTGACGACCAGC |
| <i>OsAmy3B</i> : proP2    | GCTGCATAGCACGACGCATACATA | ACTTGCCCAATGGATGGATCGTTG |
| <i>OsAmy3E</i> : proP1    | GCGCTTGATCCGTACACCCGATGA | ACGCATGACGGAAACGGCGATACG |

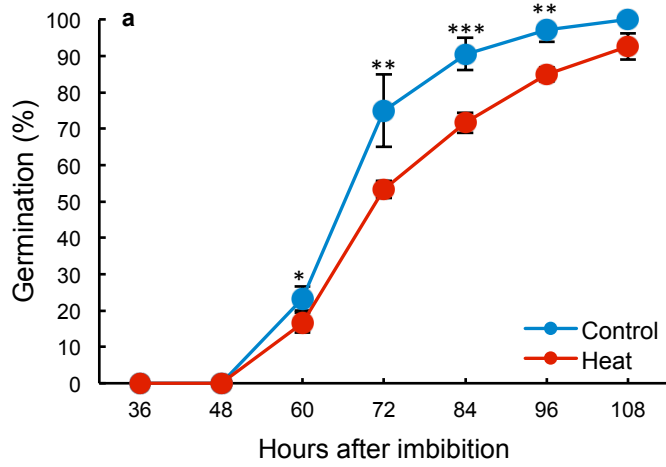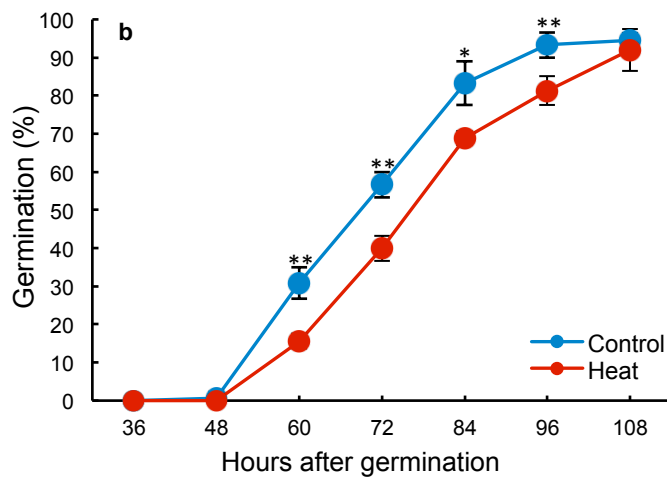

**Supplemental Figure 1.** Delay in germination caused by heat stress during grain filling in **a**, 2016 ( $n = 4$ ) and **b**, 2017 ( $n = 3$ ) with 30 seeds per replicate. Seeds were germinated at 27°C in the dark. Significant differences are shown as  $P < 0.05^*$ ,  $P < 0.01^{**}$ , and  $P < 0.001^{***}$  according to Student's  $t$ -test. Error bars, SD.

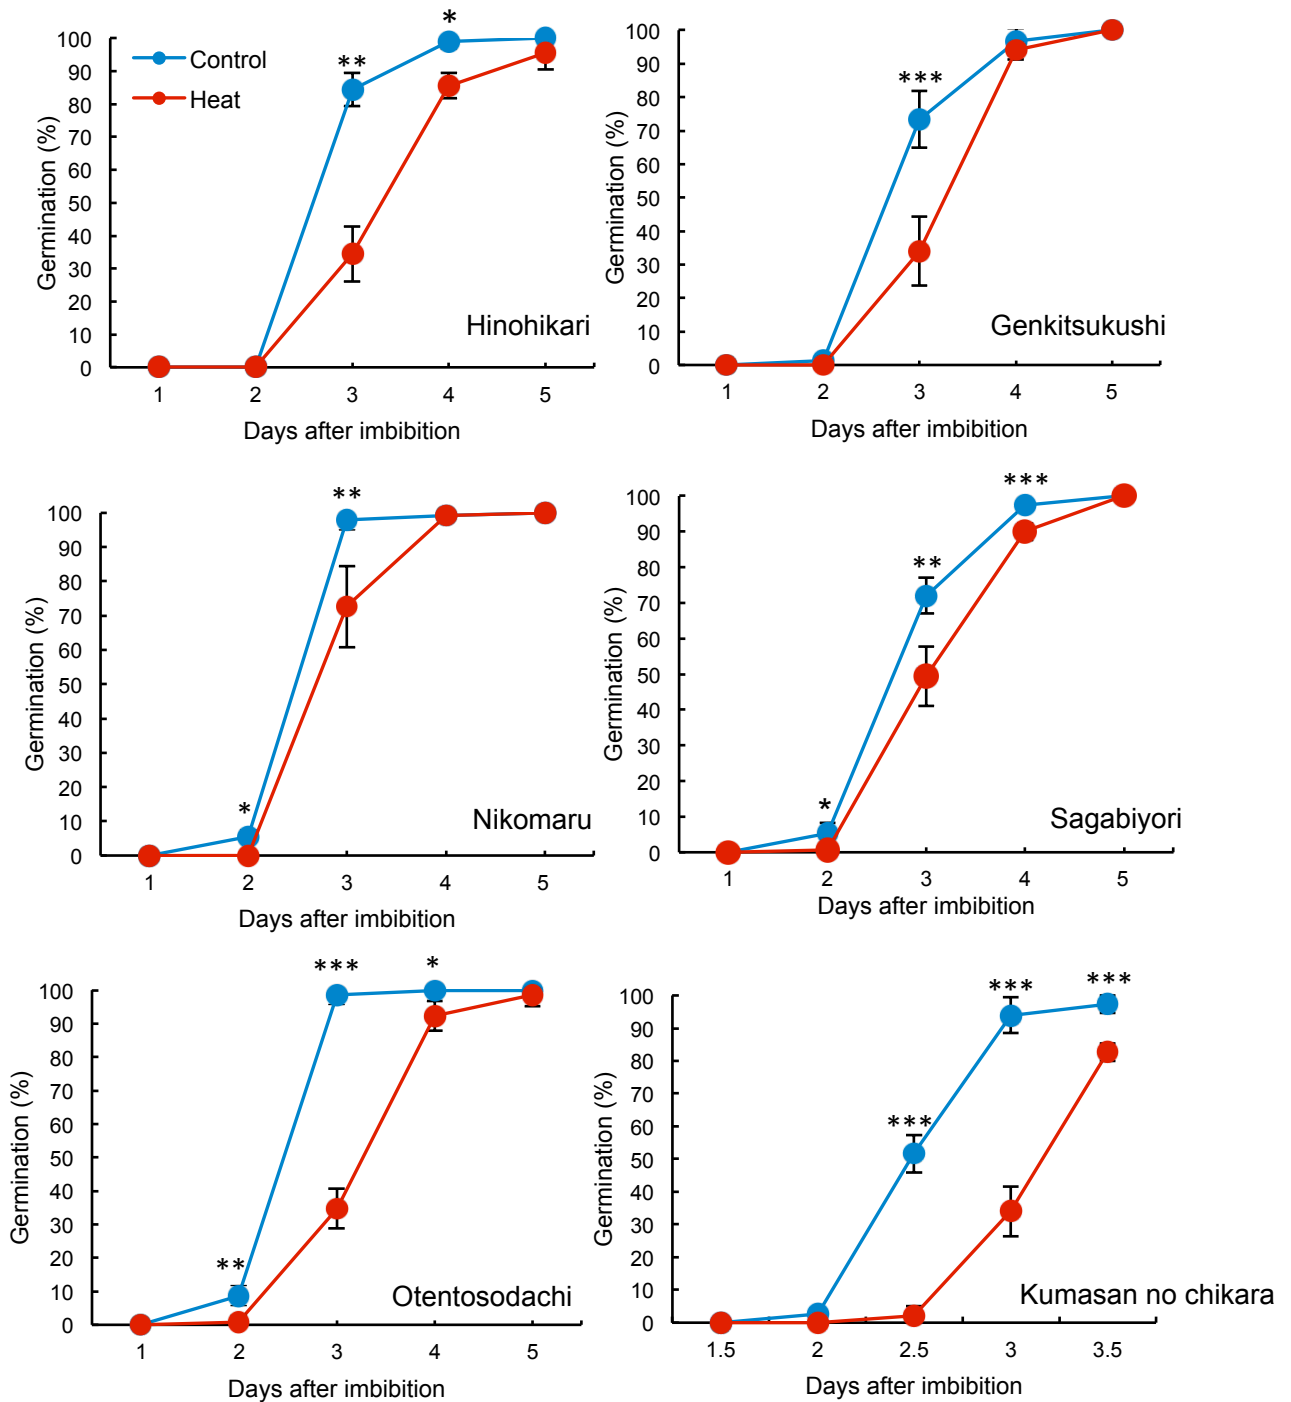

**Supplemental Figure 2.** Delay in germination of heat-stressed seeds of the heat stress-sensitive rice cultivar 'Hinohikari' and heat stress-tolerant cultivars 'Genkitsukushi', 'Nikomaru', 'Sagabiyori', 'Otentosodachi', and 'Kumsan no chikara'. Harvested seeds were obtained from Tanamachi et al. (2016), who used exactly the same cultivation methods as in this study. Seeds were germinated at 27°C in the dark. Significant differences are shown as  $P < 0.05^*$ ,  $P < 0.01^{**}$ , and  $P < 0.001^{***}$  according to Student's  $t$ -test ( $n = 3$ ). Error bars, SD.

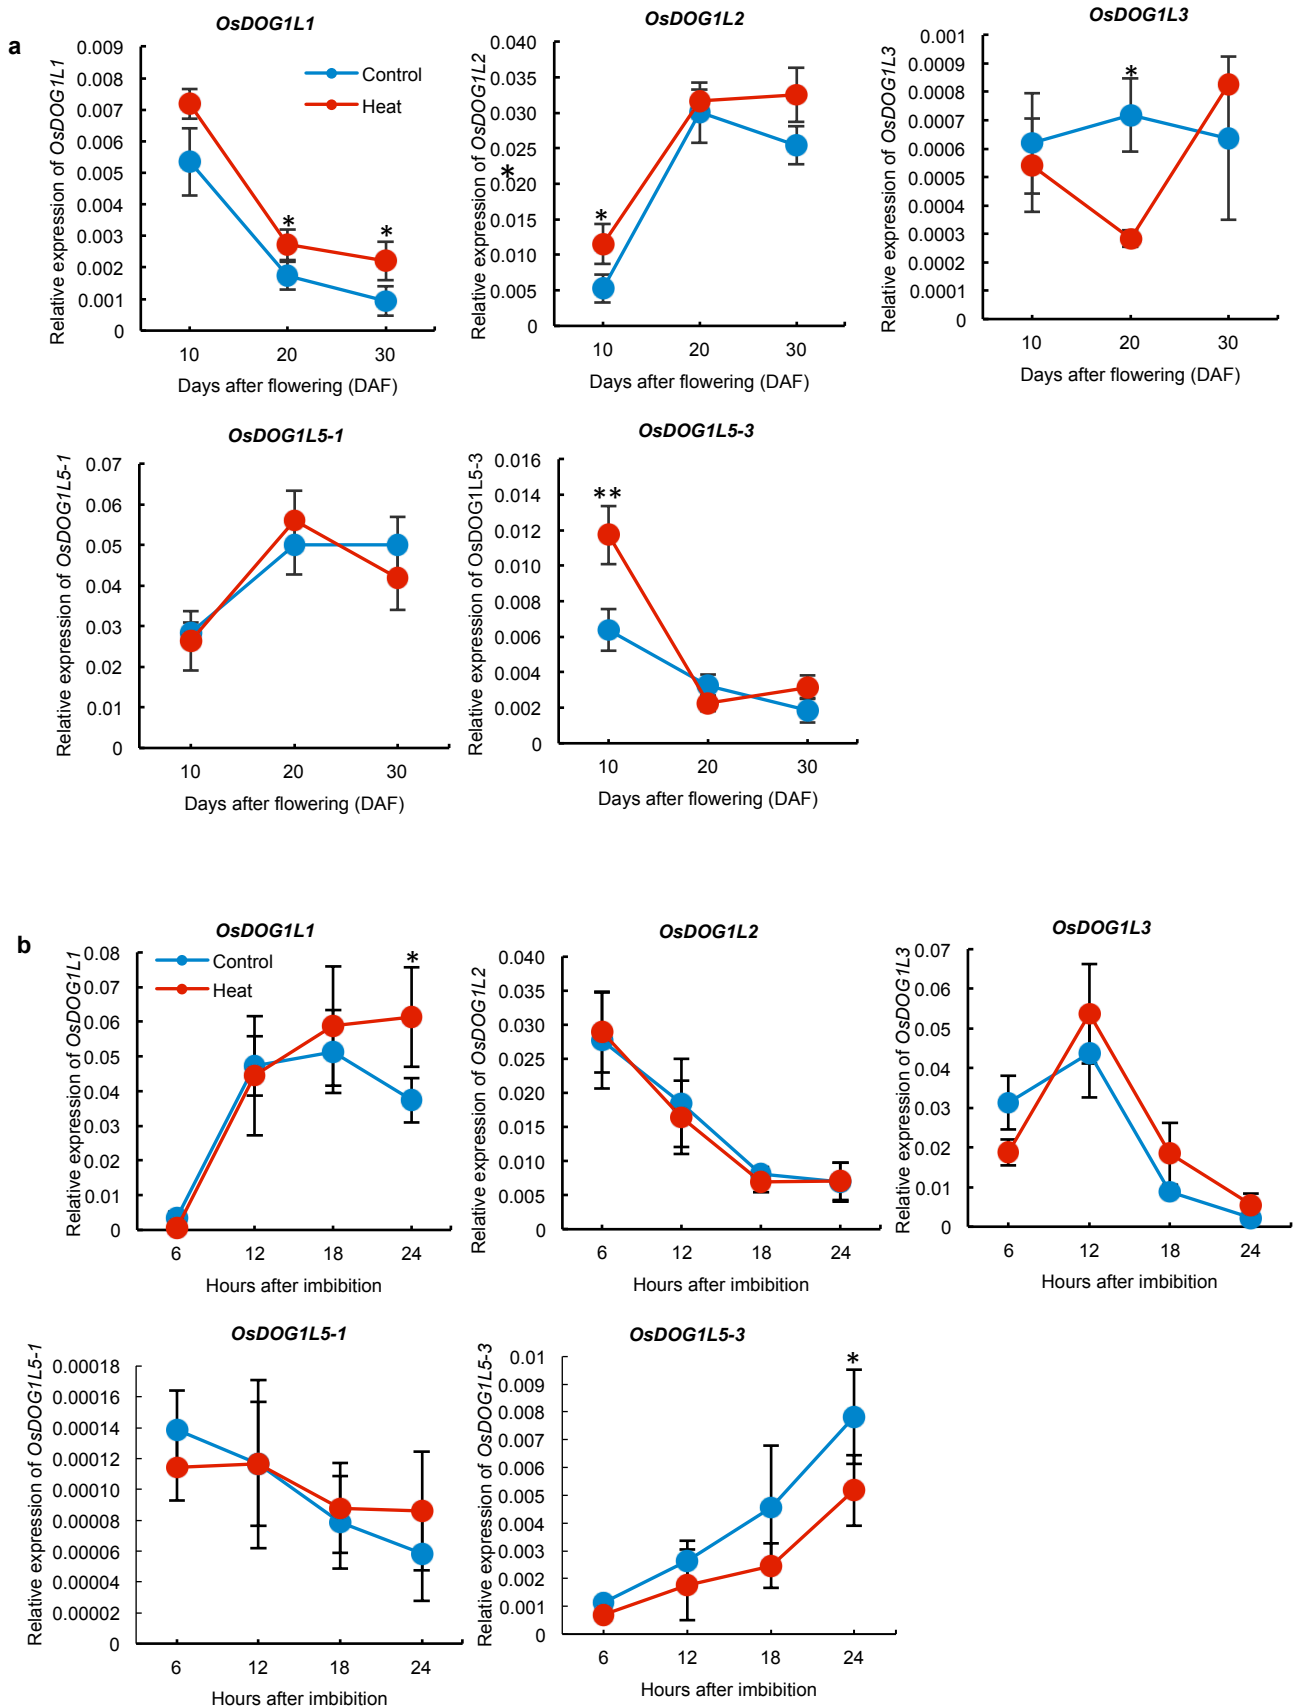

**Supplemental Figure 3. Expression of DOG1-like genes in control and heat.** **a.** Relative gene expression of *DOG1-like* genes in developing seeds under control (25°C) and heat (30°C) conditions. **b.** Relative gene expression of *DOG1-like* genes in embryos during imbibition. Significant differences are shown as  $P < 0.05^*$ ,  $P < 0.01^{**}$ , and  $P < 0.001^{***}$  according to Student's *t*-test ( $n = 3$ ). Error bars, SD.

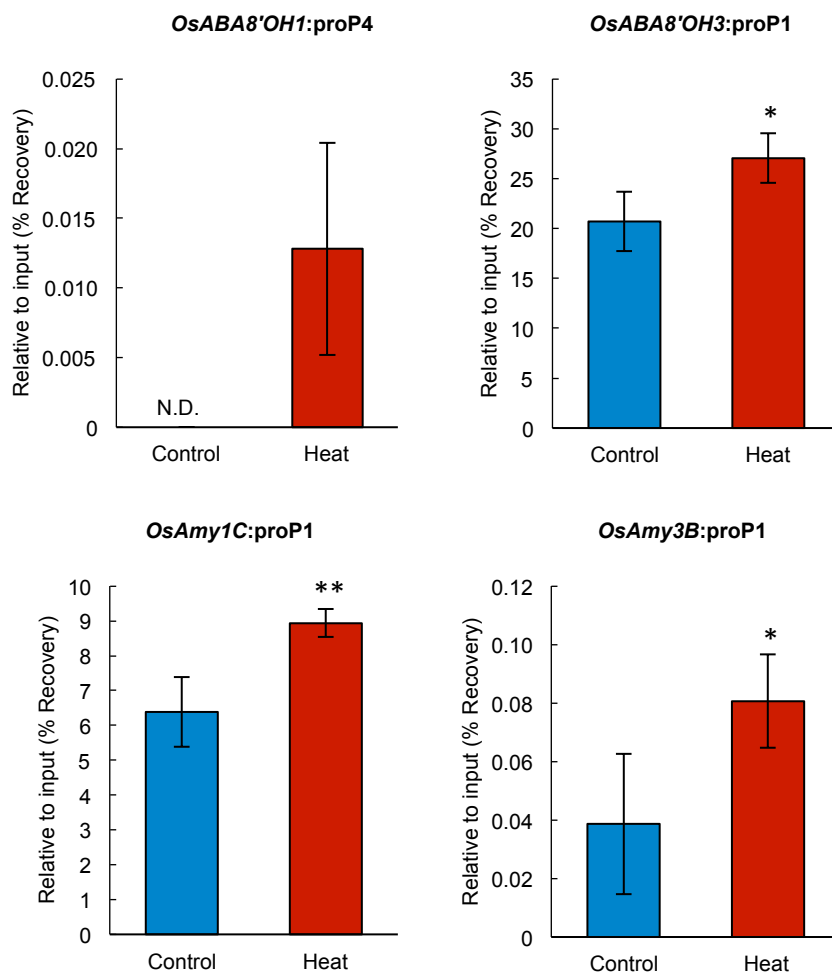

**Supplemental Figure 4.** DNA methylation levels of *OsABA8'OH1*, *OsABA8'OH3*, *OsAmy1C* and *OsAmy3B* promoters. Methylated DNA was precipitated and analyzed via MeDIP-qPCR. Significant differences are shown as  $P < 0.05^*$  and  $P < 0.01^{**}$  according to Student's *t*-test ( $n = 3$ ). Error bars, SD.
